# Supplementary material
Source: MDPI journal article supplement (https://www.mdpi.com/1999-4907/12/1/54)
Supplement: s1 [file s1]

Supplementary material S1

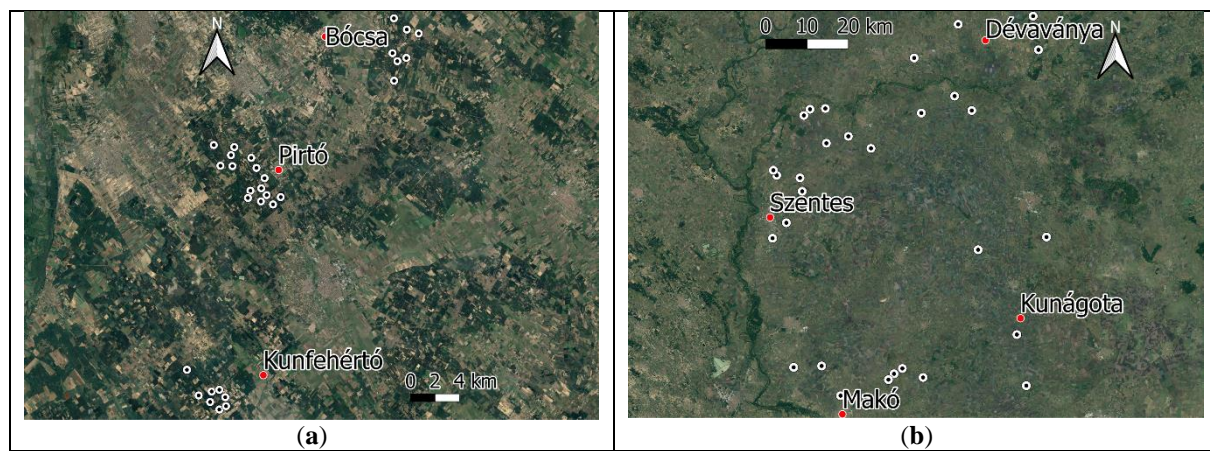

**Figure S1.** (a) Sampling sites on forest-steppes; (a) Sampling sites on kurgans. Aerial image was obtained from Google Earth.
